# Supplementary material for: Structural Basis for the Inhibition of Cyclin G‐Associated Kinase by Gefitinib
Source: PubMed Central journal article supplement — ChemistryOpen. 2018 Sep 10;7(9):713–9. doi: 10.1002/open.201800177 (PMC6129943; doi:10.1002/open.201800177), 2018-09-10
Supplement: OPEN-7-713-s001.pdf [file OPEN-7-713-s001.pdf]

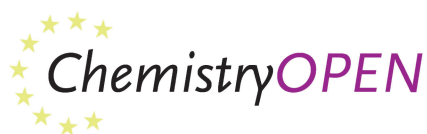

## Supporting Information

© 2018 The Authors. Published by Wiley-VCH Verlag GmbH & Co. KGaA, Weinheim

### **Structural Basis for the Inhibition of Cyclin G-Associated Kinase by Gefitinib**

Naomi Ohbayashi<sup>+, [a]</sup> Kazutaka Murayama<sup>+, [b, c]</sup> Miyuki Kato-Murayama,<sup>[b]</sup> Mutsuko Kukimoto-Niino,<sup>[b]</sup> Tamami Uejima,<sup>[b]</sup> Takayoshi Matsuda,<sup>[a]</sup> Noboru Ohsawa,<sup>[a]</sup> Shigeyuki Yokoyama,<sup>[d]</sup> Hiroshi Nojima,<sup>[e]</sup> and Mikako Shirouzu<sup>\*[b]</sup>

open\_201800177\_sm\_miscellaneous\_information.pdf

Table S1. Data collection and refinement statistics.

|                                                     | GAK_1                              | GAK_2                 |
|-----------------------------------------------------|------------------------------------|-----------------------|
| <b>Data collection</b>                              |                                    |                       |
| X-ray source                                        | BL32XU, SPring-8                   | BL32XU, SPring-8      |
| Wavelength (Å)                                      | 1.0                                | 1.0                   |
| Space group                                         | $P2_1 2_1 2_1$                     | $P2_1 2_1 2_1$        |
| Cell dimensions                                     |                                    |                       |
| <i>a</i> , <i>b</i> , <i>c</i> (Å)                  | 76.4, 85.5, 149.0                  | 70.3, 73.9, 95.3      |
| Resolution (Å)                                      | 50.0–2.80 (2.87–2.80) <sup>1</sup> | 47.7–2.50 (2.60–2.50) |
| <i>R</i> <sub>merge</sub>                           | 0.286 (0.923)                      | 0.148 (0.547)         |
| <i>I</i> / $\sigma(I)$                              | 5.3 (1.46)                         | 11.4 (4.3)            |
| Completeness (%)                                    | 97.0 (98.6)                        | 100.0 (100.0)         |
| Redundancy                                          | 3.3 (3.0)                          | 9.3 (9.9)             |
| <b>Refinement</b>                                   |                                    |                       |
| Resolution (Å)                                      | 45.3–2.8                           | 44.9–2.5              |
| No. reflections                                     | 23789                              | 17740                 |
| <i>R</i> <sub>work</sub> / <i>R</i> <sub>free</sub> | 0.233/0.288                        | 0.230/0.282           |
| No. atoms                                           |                                    |                       |
| Protein                                             | 6898                               | 3410                  |
| Ligand/SO <sub>4</sub>                              | 62/25                              | 62/0                  |
| Water                                               | 9                                  | 60                    |
| <i>B</i> -factors                                   |                                    |                       |
| Protein                                             | 32.4                               | 46.8                  |
| Ligand/SO <sub>4</sub>                              | 39.0/48.0                          | 44.7/-                |
| Water                                               | 19.8                               | 43.4                  |
| R.m.s. deviations                                   |                                    |                       |
| Bond lengths (Å)                                    | 0.004                              | 0.005                 |
| Bond angles (°)                                     | 1.044                              | 1.094                 |
| Ramachandran plot                                   |                                    |                       |
| Favored (%)                                         | 97.1                               | 97.4                  |
| Allowed (%)                                         | 2.9                                | 2.6                   |
| Outliers (%)                                        | 0.0                                | 0.0                   |
| PDB ID                                              | 5Y7Z                               | 5Y80                  |

<sup>1</sup>Highest resolution shell is shown in parentheses.

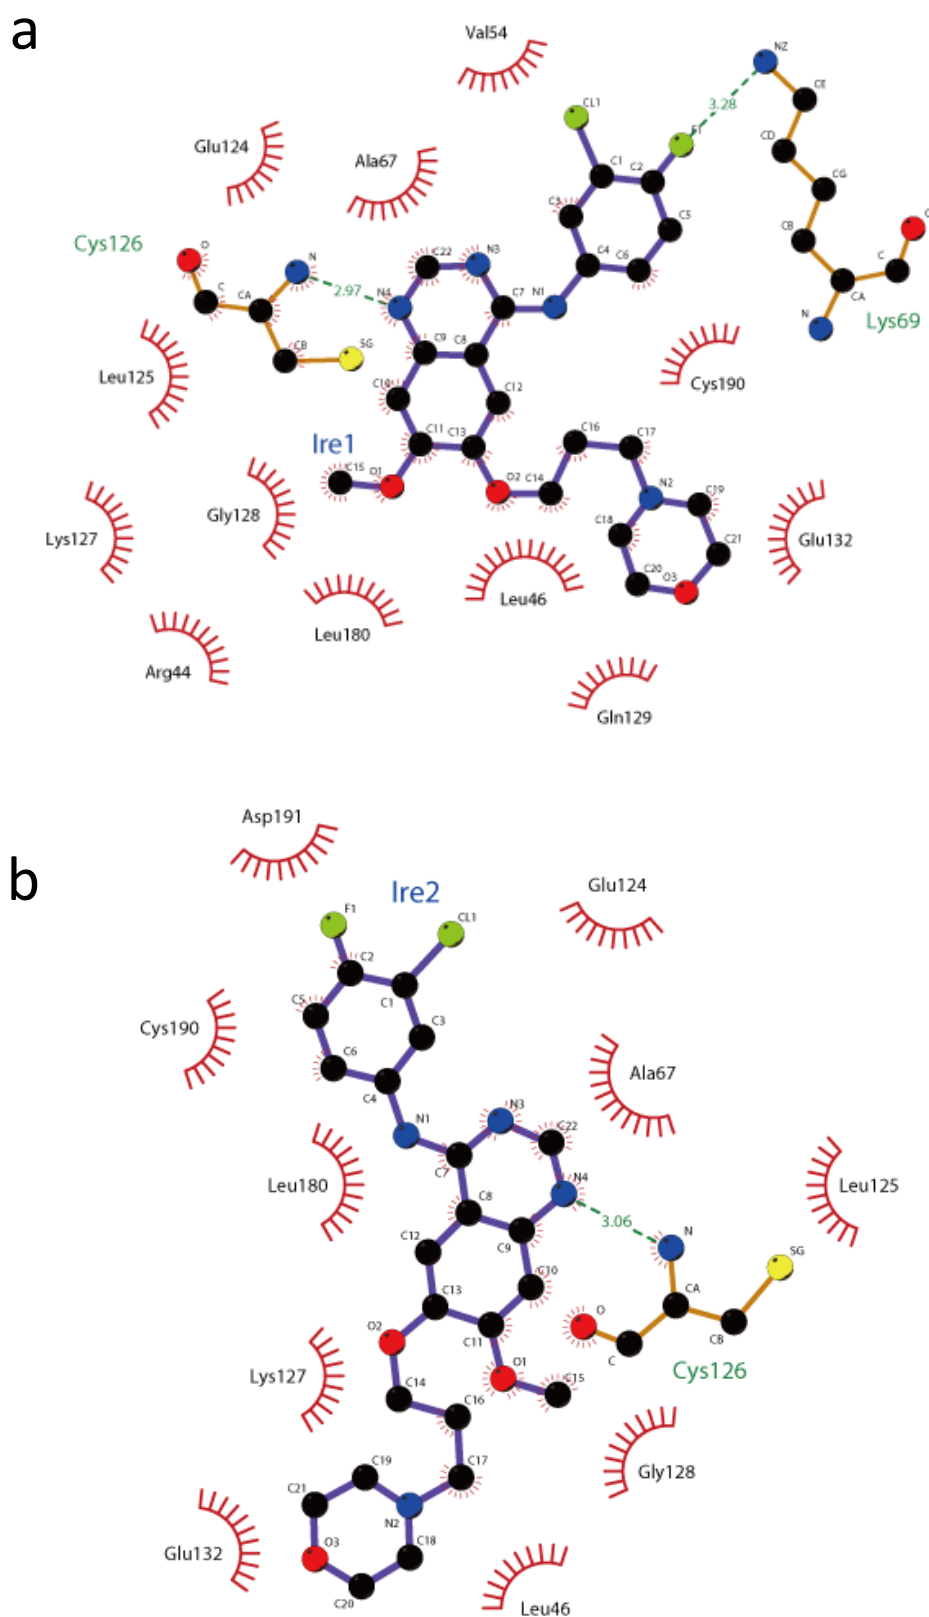

Figure S1. Two-dimensional schematic illustration of the gefitinib•GAK interactions at the ATP binding pocket in the GAK\_1 structure. Hydrogen bonds are represented as green dashed lines. Ire1 and Ire2 indicate gefitinib at each site, respectively. The figure is depicted by using LigPlot<sup>+</sup>. (a) interactions in chain A. (b) interactions in chain B.

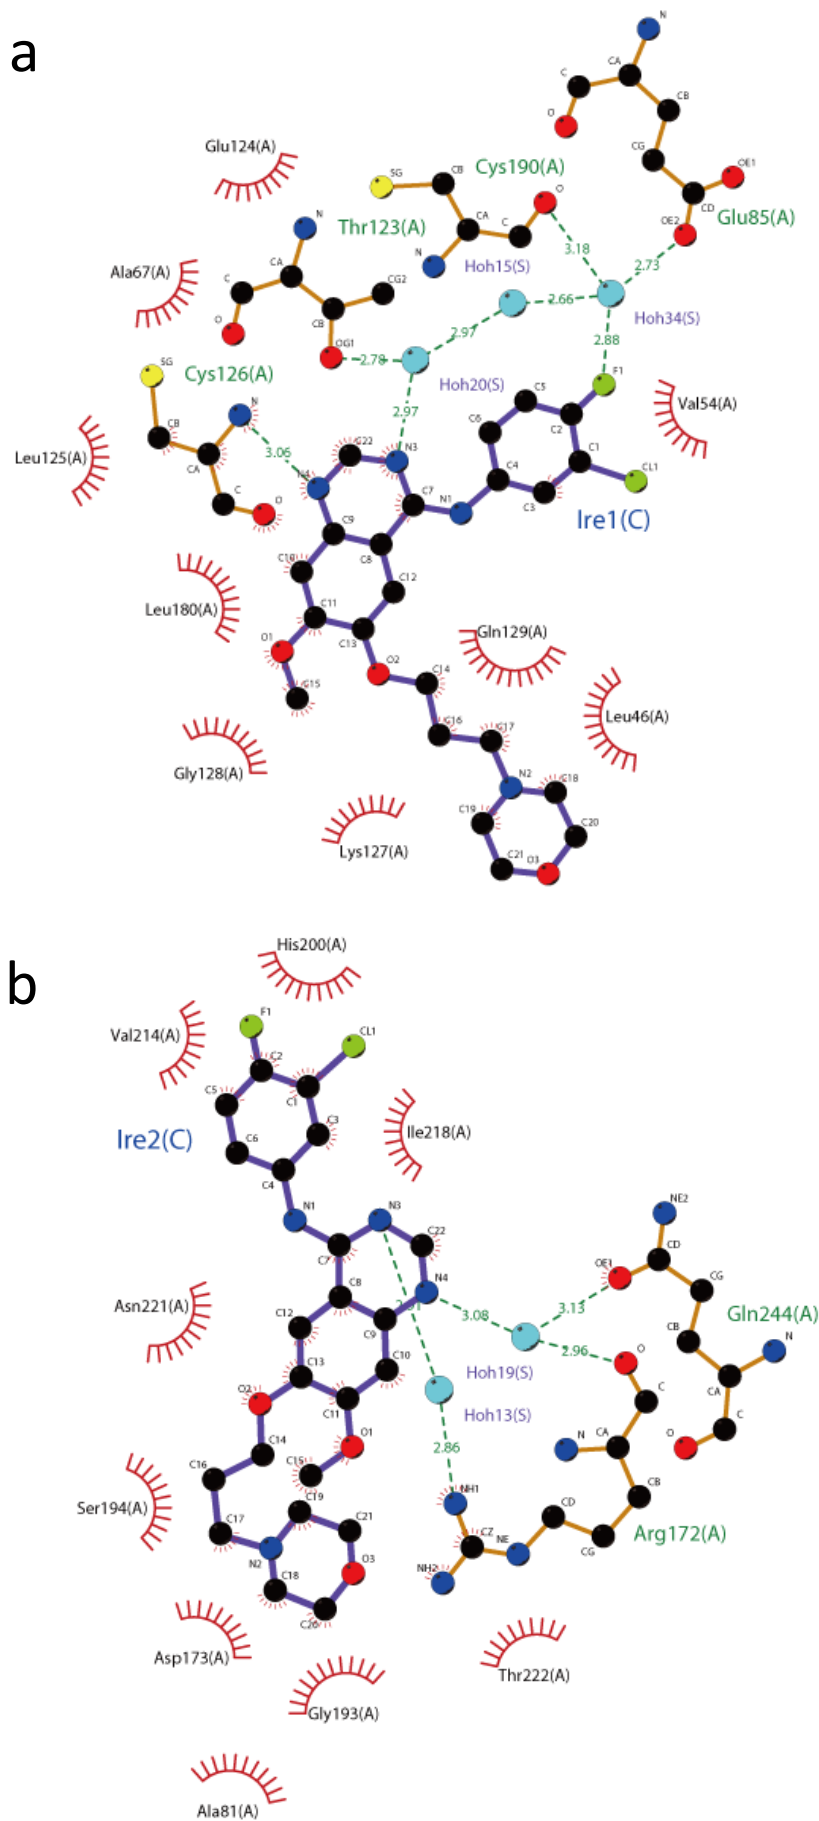

Figure S2. Two-dimensional schematic illustration of the gefitinib•GAK interactions in the GAK<sub>2</sub> structure. Hydrogen bonds are represented as green dashed lines. Ire1 and Ire2 indicate gefitinib. The figure is depicted by using LigPlot<sup>+</sup><sup>1</sup>. (a) interactions at the ATP binding pocket. (b) interactions at the second binding site.

## Reference

1. R. A. Laskowski, M. B. Swindells, LigPlot+: multiple ligand-protein interaction diagrams for drug discovery. *J. Chem. Inf. Model.* **2011**, *51*, 2778-2786.
